# Supplementary material for: The development of chronic cough in children following presentation to a tertiary paediatric emergency department with acute respiratory illness: study protocol for a prospective cohort study
Source: PubMed Central journal article supplement (PMC3766129; doi:10.1186/1471-2431-13-125), 2013-08-15
Supplement: 1471-2431-13-125-S1.pdf [file 1471-2431-13-125-S1.pdf]

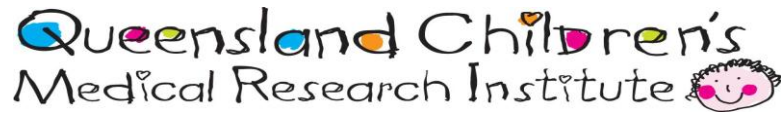

### ED Cough Study Case Report Form

(Affix RCH Identification Label Here)

Study ID: EDCS|\_|\_|\_|\_|

Has the child been previously enrolled in this study?  Yes  No  Unknown

**CONTACT DETAILS**

Who will be the primary contact parent/guardian for the purpose of this study?

Mother  Father  Guardian  Other: *Specify* \_\_\_\_\_

Primary contact's full name: \_\_\_\_\_

Primary contact's contact details:

Home phone: \_\_\_\_\_

Work phone: \_\_\_\_\_

Mobile: \_\_\_\_\_

Email: \_\_\_\_\_

Preferred method of contact for follow-up:  Home phone  
 Work phone  
 Mobile  
 Email

Preferred time of day for follow-up contact: \_\_\_\_\_ am \_\_\_\_\_ pm  Any

**Workbook completion:**  Emergency Department  
 RCH Ward (CRF to be completed in full)  
 Emergency Department and phone interview (Email Kerry-Ann O'Grady)  
Reason not completed in ED: \_\_\_\_\_  
Preferred contact time: \_\_\_\_/\_\_\_\_/\_\_\_\_ \_\_:\_\_\_\_ hrs (must be within 24 hours)

**If a phone interview is required for workbook completion continue to Part A (Page 2)**

Researcher Initials: \_\_\_\_\_

Date: \_\_\_\_/\_\_\_\_/\_\_\_\_

## PART A: ENROLMENT DETAILS

**A1. DATE OF ED PRESENTATION:** \_\_\_ \_\_\_ day \_\_\_ \_\_\_ month \_\_\_ \_\_\_ year

**A2. TIME OF ED PRESENTATION:** \_\_\_:\_\_\_ hrs (24 hour time)

**A3. INFORMED CONSENT:** Has informed consent/assent been obtained and a copy given to the participant and/or parent/guardian? Yes  No  **Date signed:** \_\_\_/\_\_\_/\_\_\_

### A4. DEMOGRAPHICS

(Affix RCH Identification Label Again Here)

### A5. Check Inclusion criteria again

All subjects enrolled must satisfy the following criteria at study entry:

|                                                                                                           |                                                          |
|-----------------------------------------------------------------------------------------------------------|----------------------------------------------------------|
| Written informed consent/assent obtained from the subject or the parent(s) or guardian(s) of the subject. | <input type="checkbox"/> Yes <input type="checkbox"/> No |
| Child aged < 15 years                                                                                     | <input type="checkbox"/> Yes <input type="checkbox"/> No |
| Presents with respiratory illness with parent reported cough as a symptom                                 | <input type="checkbox"/> Yes <input type="checkbox"/> No |
| Present in the ED between 6am and 9pm.                                                                    | <input type="checkbox"/> Yes <input type="checkbox"/> No |

### A6. Exclusion criteria

If a participant meets any of the following criteria, they do not continue with the rest of the data collection

|                                                                                                                                                                                                                           |                                                          |
|---------------------------------------------------------------------------------------------------------------------------------------------------------------------------------------------------------------------------|----------------------------------------------------------|
| Known diagnosis of chronic lung disease (excluding asthma)<br>Eg. Cystic Fibrosis, Bronchiectasis, Chronic Suppurative Lung Disease, Bronchomalacia, Congenital or neonatal lung disease, Protracted Bacterial Bronchitis | <input type="checkbox"/> Yes <input type="checkbox"/> No |
| Known immunosuppressive condition including HIV and cancer, leukaemia                                                                                                                                                     | <input type="checkbox"/> Yes <input type="checkbox"/> No |
| Immunomodulating drugs in the 30 days <b>prior</b> to presentation. Inhaled steroids and oral steroids (eg prednisolone) are allowed                                                                                      | <input type="checkbox"/> Yes <input type="checkbox"/> No |

**A7. Is the child eligible to continue participation in the study?**  Yes  No

**If a phone interview is required for workbook completion continue to Part C (Page 8)**

Researcher Initials: \_\_\_\_\_

Date: \_\_\_/\_\_\_/\_\_\_

**PART B: CLINICAL HISTORY**

**B1. Primary reason for presentation to ED (parent report):** \_\_\_\_\_

**B2. Triage category:**  1  2  3  4  5

**B3. Date first symptom of current illness started:** \_\_\_\_\_ day \_\_\_\_\_ month \_\_\_\_\_ year

**B4. How many days has your child had his/her current cough?**

< 3  3 - <7  7 - <14  14 - <21  21 - < 28  >28  Unknown

**B5. Has your child had any of the following symptoms/problems in the past 7 days:**

*Note: present at time of presentation is to be assessed by the research nurse by both asking the parent and clinical assessment/ED notes. A "Not applicable" response is for circumstances in which the child is too young for a valid response to be possible.*

|                            | Yes                      | No                       | Unk                      | N/A                      | # of days symptom was present | Present while in ED?                                                                  |
|----------------------------|--------------------------|--------------------------|--------------------------|--------------------------|-------------------------------|---------------------------------------------------------------------------------------|
| a. Fever/temp/feel hot     | <input type="checkbox"/> | <input type="checkbox"/> | <input type="checkbox"/> | <input type="checkbox"/> | __ __ __ __  Unk              | <input type="checkbox"/> Yes <input type="checkbox"/> No <input type="checkbox"/> N/A |
| b. Moist/wet/gurgly cough  | <input type="checkbox"/> | <input type="checkbox"/> | <input type="checkbox"/> | <input type="checkbox"/> | __ __ __ __  Unk              | <input type="checkbox"/> Yes <input type="checkbox"/> No <input type="checkbox"/> N/A |
| c. Dry cough               | <input type="checkbox"/> | <input type="checkbox"/> | <input type="checkbox"/> | <input type="checkbox"/> | __ __ __ __  Unk              | <input type="checkbox"/> Yes <input type="checkbox"/> No <input type="checkbox"/> N/A |
| d. Runny nose              | <input type="checkbox"/> | <input type="checkbox"/> | <input type="checkbox"/> | <input type="checkbox"/> | __ __ __ __  Unk              | <input type="checkbox"/> Yes <input type="checkbox"/> No <input type="checkbox"/> N/A |
| e. Increased tiredness     | <input type="checkbox"/> | <input type="checkbox"/> | <input type="checkbox"/> | <input type="checkbox"/> | __ __ __ __  Unk              | <input type="checkbox"/> Yes <input type="checkbox"/> No <input type="checkbox"/> N/A |
| f. Sore throat             | <input type="checkbox"/> | <input type="checkbox"/> | <input type="checkbox"/> | <input type="checkbox"/> | __ __ __ __  Unk              | <input type="checkbox"/> Yes <input type="checkbox"/> No <input type="checkbox"/> N/A |
| g. Chest indrawing         | <input type="checkbox"/> | <input type="checkbox"/> | <input type="checkbox"/> | <input type="checkbox"/> | __ __ __ __  Unk              | <input type="checkbox"/> Yes <input type="checkbox"/> No <input type="checkbox"/> N/A |
| h. Wheeze/whistle          | <input type="checkbox"/> | <input type="checkbox"/> | <input type="checkbox"/> | <input type="checkbox"/> | __ __ __ __  Unk              | <input type="checkbox"/> Yes <input type="checkbox"/> No <input type="checkbox"/> N/A |
| i. Shortness of breath     | <input type="checkbox"/> | <input type="checkbox"/> | <input type="checkbox"/> | <input type="checkbox"/> | __ __ __ __  Unk              | <input type="checkbox"/> Yes <input type="checkbox"/> No <input type="checkbox"/> N/A |
| j. Fast breathing          | <input type="checkbox"/> | <input type="checkbox"/> | <input type="checkbox"/> | <input type="checkbox"/> | __ __ __ __  Unk              | <input type="checkbox"/> Yes <input type="checkbox"/> No <input type="checkbox"/> N/A |
| k. Nasal flaring           | <input type="checkbox"/> | <input type="checkbox"/> | <input type="checkbox"/> | <input type="checkbox"/> | __ __ __ __  Unk              | <input type="checkbox"/> Yes <input type="checkbox"/> No <input type="checkbox"/> N/A |
| l. Earache                 | <input type="checkbox"/> | <input type="checkbox"/> | <input type="checkbox"/> | <input type="checkbox"/> | __ __ __ __  Unk              | <input type="checkbox"/> Yes <input type="checkbox"/> No <input type="checkbox"/> N/A |
| m. Chills                  | <input type="checkbox"/> | <input type="checkbox"/> | <input type="checkbox"/> | <input type="checkbox"/> | __ __ __ __  Unk              | <input type="checkbox"/> Yes <input type="checkbox"/> No <input type="checkbox"/> N/A |
| n. Muscle aches/ pains     | <input type="checkbox"/> | <input type="checkbox"/> | <input type="checkbox"/> | <input type="checkbox"/> | __ __ __ __  Unk              | <input type="checkbox"/> Yes <input type="checkbox"/> No <input type="checkbox"/> N/A |
| o. Headache                | <input type="checkbox"/> | <input type="checkbox"/> | <input type="checkbox"/> | <input type="checkbox"/> | __ __ __ __  Unk              | <input type="checkbox"/> Yes <input type="checkbox"/> No <input type="checkbox"/> N/A |
| p. Irritability            | <input type="checkbox"/> | <input type="checkbox"/> | <input type="checkbox"/> | <input type="checkbox"/> | __ __ __ __  Unk              | <input type="checkbox"/> Yes <input type="checkbox"/> No <input type="checkbox"/> N/A |
| q. Vomiting                | <input type="checkbox"/> | <input type="checkbox"/> | <input type="checkbox"/> | <input type="checkbox"/> | __ __ __ __  Unk              | <input type="checkbox"/> Yes <input type="checkbox"/> No <input type="checkbox"/> N/A |
| r. Diarrhoea*              | <input type="checkbox"/> | <input type="checkbox"/> | <input type="checkbox"/> | <input type="checkbox"/> | __ __ __ __  Unk              | <input type="checkbox"/> Yes <input type="checkbox"/> No <input type="checkbox"/> N/A |
| s. Cyanosis                | <input type="checkbox"/> | <input type="checkbox"/> | <input type="checkbox"/> | <input type="checkbox"/> | __ __ __ __  Unk              | <input type="checkbox"/> Yes <input type="checkbox"/> No <input type="checkbox"/> N/A |
| t. Unsettled sleep         | <input type="checkbox"/> | <input type="checkbox"/> | <input type="checkbox"/> | <input type="checkbox"/> | __ __ __ __  Unk              | <input type="checkbox"/> Yes <input type="checkbox"/> No <input type="checkbox"/> N/A |
| u. Missed school/daycare   | <input type="checkbox"/> | <input type="checkbox"/> | <input type="checkbox"/> | <input type="checkbox"/> | __ __ __ __  Unk              | <input type="checkbox"/> Yes <input type="checkbox"/> No <input type="checkbox"/> N/A |
| v. Unable to play/exercise | <input type="checkbox"/> | <input type="checkbox"/> | <input type="checkbox"/> | <input type="checkbox"/> | __ __ __ __  Unk              | <input type="checkbox"/> Yes <input type="checkbox"/> No <input type="checkbox"/> N/A |
| w. Feeding difficulties    | <input type="checkbox"/> | <input type="checkbox"/> | <input type="checkbox"/> | <input type="checkbox"/> | __ __ __ __  Unk              | <input type="checkbox"/> Yes <input type="checkbox"/> No <input type="checkbox"/> N/A |
| x. Poor appetite           | <input type="checkbox"/> | <input type="checkbox"/> | <input type="checkbox"/> | <input type="checkbox"/> | __ __ __ __  Unk              | <input type="checkbox"/> Yes <input type="checkbox"/> No <input type="checkbox"/> N/A |
| y. Stridor                 | <input type="checkbox"/> | <input type="checkbox"/> | <input type="checkbox"/> | <input type="checkbox"/> | __ __ __ __  Unk              | <input type="checkbox"/> Yes <input type="checkbox"/> No <input type="checkbox"/> N/A |

\* Note: defined as ≥ 3 loose stools in a 24 hour period

**B6. I am now going to ask you to score your child’s cough for both today and last night. Cough score – please let me know which one of these options best describes your child’s cough.**

| Day-time cough score (today)                                                         | Night-time cough score (last night)                     |
|--------------------------------------------------------------------------------------|---------------------------------------------------------|
| 0 = No cough during the day                                                          | 0 = No cough at night                                   |
| 1 = Cough for one-two short periods only                                             | 1a = Cough on waking only (cough did not wake child up) |
| 2 = Cough for more than two short periods                                            | 1b = Cough on going to sleep only                       |
| 3 = Frequent coughing but does NOT interfere with school or other daytime activities | 2 = Awoken once or awoken early due to coughing         |
| 4 = Frequent coughing which DOES interfere with school or other daytime activities   | 3 = Frequent waking due to cough(s)                     |
| 5 = Cannot perform most usual daytime activity due to severe coughing                | 4 = Frequent cough most of the night                    |
|                                                                                      | 5 = Distressing cough                                   |

**B7. Has the child been seen by other health professionals/services other than this ED presentation for his/her current illness?**  Yes  No  Unknown

*B7.1 If yes, tick all that apply:*

- GP # times seen: |\_\_|\_\_|  Unk #days since last seen: |\_\_|\_\_|  Unk
- Other ED/Hospital # times seen: |\_\_|\_\_|  Unk #days since last seen: |\_\_|\_\_|  Unk
- Community health nurse # times seen: |\_\_|\_\_|  Unk #days since last seen: |\_\_|\_\_|  Unk
- School nurse # times seen: |\_\_|\_\_|  Unk #days since last seen: |\_\_|\_\_|  Unk
- Pharmacist # times seen: |\_\_|\_\_|  Unk #days since last seen: |\_\_|\_\_|  Unk
- Natural therapist # times seen: |\_\_|\_\_|  Unk #days since last seen: |\_\_|\_\_|  Unk
- Other # times seen: |\_\_|\_\_|  Unk #days since last seen: |\_\_|\_\_|  Unk  
(Specify) \_\_\_\_\_

**B8. Respiratory history in past 12 months**

|                                                                                                                                                                                                                                                                                                                                                                                                                                                                                                                                                 |                                                                                                                                                                                                                                                                                                                                                                                                                                                                                                                                                                                                                                                                                                                                                                                                                                |
|-------------------------------------------------------------------------------------------------------------------------------------------------------------------------------------------------------------------------------------------------------------------------------------------------------------------------------------------------------------------------------------------------------------------------------------------------------------------------------------------------------------------------------------------------|--------------------------------------------------------------------------------------------------------------------------------------------------------------------------------------------------------------------------------------------------------------------------------------------------------------------------------------------------------------------------------------------------------------------------------------------------------------------------------------------------------------------------------------------------------------------------------------------------------------------------------------------------------------------------------------------------------------------------------------------------------------------------------------------------------------------------------|
| <p><b>B8.1</b> In the past 12 months, has your child had a cough that has lasted more than 4 weeks?<br/> <i>If yes: How many times has the child had a cough that has lasted more than 4 weeks?</i><br/> <i>Did you see a doctor about this cough?</i><br/> <i>If yes, what was the diagnosis?</i> _____</p>                                                                                                                                                                                                                                    | <p><input type="checkbox"/> Yes <input type="checkbox"/> No <input type="checkbox"/> Unknown<br/>  __ __  <input type="checkbox"/> Unknown<br/> <input type="checkbox"/> Yes <input type="checkbox"/> No <input type="checkbox"/> Unknown<br/> <input type="checkbox"/> No diagnosis <input type="checkbox"/> Unknown</p>                                                                                                                                                                                                                                                                                                                                                                                                                                                                                                      |
| <p><b>B8.2</b> Has your child been diagnosed by a doctor with a respiratory illness in the past 12 months?<br/> <i>If yes: Asthma/Reactive airways disease</i><br/> <i>Pneumonia (confirmed by chest xray)</i><br/> <i>Influenza (confirmed by laboratory test, eg NPA or blood test)</i><br/> <i>Bronchiolitis</i><br/> <i>Bronchitis</i><br/> <i>Croup</i><br/> <i>Whooping cough (laboratory confirmed)</i><br/> <i>Otitis media</i><br/> <i>Tonsillitis</i><br/> <i>Other</i><br/> Specify _____</p>                                        | <p><input type="checkbox"/> Yes <input type="checkbox"/> No <input type="checkbox"/> Unknown<br/> <input type="checkbox"/> Yes <input type="checkbox"/> No # times  __ __ <br/> <input type="checkbox"/> Yes <input type="checkbox"/> No # times  __ __ <br/> <input type="checkbox"/> Yes <input type="checkbox"/> No # times  __ __ <br/> <input type="checkbox"/> Yes <input type="checkbox"/> No # times  __ __ <br/> <input type="checkbox"/> Yes <input type="checkbox"/> No # times  __ __ <br/> <input type="checkbox"/> Yes <input type="checkbox"/> No # times  __ __ <br/> <input type="checkbox"/> Yes <input type="checkbox"/> No # times  __ __ <br/> <input type="checkbox"/> Yes <input type="checkbox"/> No # times  __ __ <br/> <input type="checkbox"/> Yes <input type="checkbox"/> No # times  __ __ </p> |
| <p><b>B8.3</b> Has your child been hospitalised for an acute respiratory illness in the past 12 months?<br/> <i>If yes: Asthma /Reactive airways disease</i><br/> <i>Pneumonia</i><br/> <i>Influenza</i><br/> <i>Bronchiolitis</i><br/> <i>Bronchitis</i><br/> <i>Whooping Cough (laboratory confirmed)</i><br/> <i>Croup</i><br/> <i>Other (specify)</i> _____</p>                                                                                                                                                                             | <p><input type="checkbox"/> Yes <input type="checkbox"/> No <input type="checkbox"/> Unknown<br/> <input type="checkbox"/> Yes <input type="checkbox"/> No # times  __ __ <br/> <input type="checkbox"/> Yes <input type="checkbox"/> No # times  __ __ <br/> <input type="checkbox"/> Yes <input type="checkbox"/> No # times  __ __ <br/> <input type="checkbox"/> Yes <input type="checkbox"/> No # times  __ __ <br/> <input type="checkbox"/> Yes <input type="checkbox"/> No # times  __ __ <br/> <input type="checkbox"/> Yes <input type="checkbox"/> No # times  __ __ <br/> <input type="checkbox"/> Yes <input type="checkbox"/> No # times  __ __ <br/> <input type="checkbox"/> Yes <input type="checkbox"/> No # times  __ __ </p>                                                                               |
| <p><b>B8.4</b> Does your child have any allergies? <i>If yes:</i><br/> Dust <input type="checkbox"/> Yes <input type="checkbox"/> No<br/> Pollen <input type="checkbox"/> Yes <input type="checkbox"/> No<br/> Insects <input type="checkbox"/> Yes <input type="checkbox"/> No<br/> Medications <input type="checkbox"/> Yes <input type="checkbox"/> No Specify _____<br/> Food <input type="checkbox"/> Yes <input type="checkbox"/> No Specify _____<br/> Other: <input type="checkbox"/> Yes <input type="checkbox"/> No Specify _____</p> | <p><input type="checkbox"/> Yes <input type="checkbox"/> No <input type="checkbox"/> Unknown</p>                                                                                                                                                                                                                                                                                                                                                                                                                                                                                                                                                                                                                                                                                                                               |

|                                                                                                                                                                                                                                                                                                                                                                                                                                            |                                                                                                                                                                                                                                                                                                                                                                                                     |
|--------------------------------------------------------------------------------------------------------------------------------------------------------------------------------------------------------------------------------------------------------------------------------------------------------------------------------------------------------------------------------------------------------------------------------------------|-----------------------------------------------------------------------------------------------------------------------------------------------------------------------------------------------------------------------------------------------------------------------------------------------------------------------------------------------------------------------------------------------------|
| <p><b>B8.5.</b> Has your child ever had an itchy rash that was coming and going for at least 6 months?<br/> <i>If yes, a) has your child had this rash in the past 12 months?</i><br/> <i>b) Has this itchy rash at any time affected any of the following places: the folds of the elbows, behind the knees, in front of the ankles, under the buttocks, or around the neck, ears or eyes?</i></p> <p>Has your child ever had eczema?</p> | <p><input type="checkbox"/> Yes <input type="checkbox"/> No <input type="checkbox"/> Unknown</p> <p><input type="checkbox"/> Yes <input type="checkbox"/> No <input type="checkbox"/> Unknown</p> <p><input type="checkbox"/> Yes <input type="checkbox"/> No <input type="checkbox"/> Unknown</p> <p><input type="checkbox"/> Yes <input type="checkbox"/> No <input type="checkbox"/> Unknown</p> |
| <p><b>B8.6.</b> Has your child had wheezing or whistling in the chest in the last 12 months?<br/> <i>If no, has your child ever had wheezing or whistling in the chest?</i></p>                                                                                                                                                                                                                                                            | <p><input type="checkbox"/> Yes <input type="checkbox"/> No <input type="checkbox"/> Unknown</p> <p><input type="checkbox"/> Yes <input type="checkbox"/> No <input type="checkbox"/> Unknown</p>                                                                                                                                                                                                   |

**B9. Risk factors**

*I am now going to ask you some questions about things that are thought to play an important role in children getting chest infections and chronic cough. We need to find out these things so we can work out what things we need to address to help prevent children from developing chronic cough*

| Risk factor data                                                                                                                                                                                                                                                                                                                                                                                         |                                                                                                                                                                                                                                                                                                                                                              |
|----------------------------------------------------------------------------------------------------------------------------------------------------------------------------------------------------------------------------------------------------------------------------------------------------------------------------------------------------------------------------------------------------------|--------------------------------------------------------------------------------------------------------------------------------------------------------------------------------------------------------------------------------------------------------------------------------------------------------------------------------------------------------------|
| <p><b>9.1 Household information</b></p> <p>9.1a Number of children usually living in house with your child:<br/> <i>If other children record ages of other children living in house:</i><br/>           Child # 1 ____ # 2 ____ #3 ____ #4 ____ #5 ____</p> <p>9.1b Number of bedrooms in the house your child usually lives in:</p> <p>9.1c Total number people usually living in house with child:</p> | <p> __ __  <input type="checkbox"/> Unknown</p> <p> __ __  <input type="checkbox"/> Unknown</p> <p> __ __  <input type="checkbox"/> Unknown</p>                                                                                                                                                                                                              |
| <p><b>9.2 Pregnancy related factors</b></p> <p>9.2a Birth weight (gms):</p> <p>9.2b Gestational age:</p> <p>9.2c Maternal smoking in pregnancy:</p>                                                                                                                                                                                                                                                      | <p> __ __ __ __  <input type="checkbox"/> Unknown</p> <p>_____ weeks <input type="checkbox"/> Unknown</p> <p><input type="checkbox"/> Yes <input type="checkbox"/> No <input type="checkbox"/> Unk</p>                                                                                                                                                       |
| <p><b>9.3 Breastfeeding</b></p> <p>9.3a Currently breastfed?<br/> <i>If yes, <input type="checkbox"/> Exclusively <input type="checkbox"/> Partially</i></p> <p>9.3b <i>If no, ever breastfed?</i><br/> <i>If yes, age feeding ceased: _____</i></p>                                                                                                                                                     | <p><input type="checkbox"/> Yes <input type="checkbox"/> No <input type="checkbox"/> Unknown</p> <p><input type="checkbox"/> Yes <input type="checkbox"/> No <input type="checkbox"/> Unknown</p>                                                                                                                                                            |
| <p><b>9.4 Exposure to tobacco smoke</b></p> <p>9.4a Current smoker?<br/> <i>If yes, age started: _____ #/day:  __ __ </i></p> <p>9.4b Ever smoked?<br/> <i>If yes, age started: _____ age stopped: _____ #day  __ __ </i></p> <p>9.4c Household exposure?<br/> <i>If yes: <input type="checkbox"/> Mother <input type="checkbox"/> Father <input type="checkbox"/> Others</i></p>                        | <p><input type="checkbox"/> Yes <input type="checkbox"/> No <input type="checkbox"/> Unknown <input type="checkbox"/> N/A</p> <p><input type="checkbox"/> Yes <input type="checkbox"/> No <input type="checkbox"/> Unknown <input type="checkbox"/> N/A</p> <p><input type="checkbox"/> Yes <input type="checkbox"/> No <input type="checkbox"/> Unknown</p> |
| <p><b>9.5 School/Childcare attendance</b></p> <p>9.5a Attends school/preschool?<br/> <i>If yes, current class year:  __ __ </i></p> <p>9.5b Attends childcare:<br/> <i>If yes, # days per week:  __ __ </i></p>                                                                                                                                                                                          | <p><input type="checkbox"/> Yes <input type="checkbox"/> No <input type="checkbox"/> Unknown</p> <p><input type="checkbox"/> Yes <input type="checkbox"/> No <input type="checkbox"/> Unknown</p>                                                                                                                                                            |

|                                                                                                                                                                                                                                                                                                                                                                                                                                                                                                                                                                                                                                                                                                                                                                                                                                                                                                                                                                                                                                                                                                                                                                                                                                                                                                                                                                                                                                                                                                                                                                                                                                                                                                                                                                                     |                                                                                                  |                              |                                  |                                  |            |                              |                             |                                  |             |                              |                             |                                  |               |                              |                             |                                  |                   |                              |                             |                                  |                 |                              |                             |                                  |               |                              |                             |                                  |                       |                              |                             |                                  |                        |                              |                             |                                  |                                                                                                                                                                                                                                                                                                                                                                                                           |
|-------------------------------------------------------------------------------------------------------------------------------------------------------------------------------------------------------------------------------------------------------------------------------------------------------------------------------------------------------------------------------------------------------------------------------------------------------------------------------------------------------------------------------------------------------------------------------------------------------------------------------------------------------------------------------------------------------------------------------------------------------------------------------------------------------------------------------------------------------------------------------------------------------------------------------------------------------------------------------------------------------------------------------------------------------------------------------------------------------------------------------------------------------------------------------------------------------------------------------------------------------------------------------------------------------------------------------------------------------------------------------------------------------------------------------------------------------------------------------------------------------------------------------------------------------------------------------------------------------------------------------------------------------------------------------------------------------------------------------------------------------------------------------------|--------------------------------------------------------------------------------------------------|------------------------------|----------------------------------|----------------------------------|------------|------------------------------|-----------------------------|----------------------------------|-------------|------------------------------|-----------------------------|----------------------------------|---------------|------------------------------|-----------------------------|----------------------------------|-------------------|------------------------------|-----------------------------|----------------------------------|-----------------|------------------------------|-----------------------------|----------------------------------|---------------|------------------------------|-----------------------------|----------------------------------|-----------------------|------------------------------|-----------------------------|----------------------------------|------------------------|------------------------------|-----------------------------|----------------------------------|-----------------------------------------------------------------------------------------------------------------------------------------------------------------------------------------------------------------------------------------------------------------------------------------------------------------------------------------------------------------------------------------------------------|
| <p><b>9.6 Family history</b><br/>9.6a Family history of asthma/reactive airways disease?</p> <p>9.6b Family history of other lung disease?<br/><i>If yes, specify:</i> _____</p> <p>9.6c Family history of allergies?</p> <p><b>9.7 Pets</b><br/>Does the child/child's household have any pets?<br/><i>If yes:</i></p> <table border="1" style="width:100%; border-collapse: collapse;"> <tr><td><i>Dog</i></td><td><input type="checkbox"/> Yes</td><td><input type="checkbox"/> No</td><td><input type="checkbox"/> Unknown</td></tr> <tr><td><i>Cat</i></td><td><input type="checkbox"/> Yes</td><td><input type="checkbox"/> No</td><td><input type="checkbox"/> Unknown</td></tr> <tr><td><i>Bird</i></td><td><input type="checkbox"/> Yes</td><td><input type="checkbox"/> No</td><td><input type="checkbox"/> Unknown</td></tr> <tr><td><i>Rabbit</i></td><td><input type="checkbox"/> Yes</td><td><input type="checkbox"/> No</td><td><input type="checkbox"/> Unknown</td></tr> <tr><td><i>Guinea Pig</i></td><td><input type="checkbox"/> Yes</td><td><input type="checkbox"/> No</td><td><input type="checkbox"/> Unknown</td></tr> <tr><td><i>Reptiles</i></td><td><input type="checkbox"/> Yes</td><td><input type="checkbox"/> No</td><td><input type="checkbox"/> Unknown</td></tr> <tr><td><i>Rabbit</i></td><td><input type="checkbox"/> Yes</td><td><input type="checkbox"/> No</td><td><input type="checkbox"/> Unknown</td></tr> <tr><td><i>Chickens/ducks</i></td><td><input type="checkbox"/> Yes</td><td><input type="checkbox"/> No</td><td><input type="checkbox"/> Unknown</td></tr> <tr><td><i>Other (specify)</i></td><td><input type="checkbox"/> Yes</td><td><input type="checkbox"/> No</td><td><input type="checkbox"/> Unknown</td></tr> </table> | <i>Dog</i>                                                                                       | <input type="checkbox"/> Yes | <input type="checkbox"/> No      | <input type="checkbox"/> Unknown | <i>Cat</i> | <input type="checkbox"/> Yes | <input type="checkbox"/> No | <input type="checkbox"/> Unknown | <i>Bird</i> | <input type="checkbox"/> Yes | <input type="checkbox"/> No | <input type="checkbox"/> Unknown | <i>Rabbit</i> | <input type="checkbox"/> Yes | <input type="checkbox"/> No | <input type="checkbox"/> Unknown | <i>Guinea Pig</i> | <input type="checkbox"/> Yes | <input type="checkbox"/> No | <input type="checkbox"/> Unknown | <i>Reptiles</i> | <input type="checkbox"/> Yes | <input type="checkbox"/> No | <input type="checkbox"/> Unknown | <i>Rabbit</i> | <input type="checkbox"/> Yes | <input type="checkbox"/> No | <input type="checkbox"/> Unknown | <i>Chickens/ducks</i> | <input type="checkbox"/> Yes | <input type="checkbox"/> No | <input type="checkbox"/> Unknown | <i>Other (specify)</i> | <input type="checkbox"/> Yes | <input type="checkbox"/> No | <input type="checkbox"/> Unknown | <p><input type="checkbox"/> Yes <input type="checkbox"/> No <input type="checkbox"/> Unknown</p> <p><input type="checkbox"/> Yes <input type="checkbox"/> No <input type="checkbox"/> Unknown</p> <p><input type="checkbox"/> Yes <input type="checkbox"/> No <input type="checkbox"/> Unknown</p> <hr/> <p><input type="checkbox"/> Yes <input type="checkbox"/> No <input type="checkbox"/> Unknown</p> |
| <i>Dog</i>                                                                                                                                                                                                                                                                                                                                                                                                                                                                                                                                                                                                                                                                                                                                                                                                                                                                                                                                                                                                                                                                                                                                                                                                                                                                                                                                                                                                                                                                                                                                                                                                                                                                                                                                                                          | <input type="checkbox"/> Yes                                                                     | <input type="checkbox"/> No  | <input type="checkbox"/> Unknown |                                  |            |                              |                             |                                  |             |                              |                             |                                  |               |                              |                             |                                  |                   |                              |                             |                                  |                 |                              |                             |                                  |               |                              |                             |                                  |                       |                              |                             |                                  |                        |                              |                             |                                  |                                                                                                                                                                                                                                                                                                                                                                                                           |
| <i>Cat</i>                                                                                                                                                                                                                                                                                                                                                                                                                                                                                                                                                                                                                                                                                                                                                                                                                                                                                                                                                                                                                                                                                                                                                                                                                                                                                                                                                                                                                                                                                                                                                                                                                                                                                                                                                                          | <input type="checkbox"/> Yes                                                                     | <input type="checkbox"/> No  | <input type="checkbox"/> Unknown |                                  |            |                              |                             |                                  |             |                              |                             |                                  |               |                              |                             |                                  |                   |                              |                             |                                  |                 |                              |                             |                                  |               |                              |                             |                                  |                       |                              |                             |                                  |                        |                              |                             |                                  |                                                                                                                                                                                                                                                                                                                                                                                                           |
| <i>Bird</i>                                                                                                                                                                                                                                                                                                                                                                                                                                                                                                                                                                                                                                                                                                                                                                                                                                                                                                                                                                                                                                                                                                                                                                                                                                                                                                                                                                                                                                                                                                                                                                                                                                                                                                                                                                         | <input type="checkbox"/> Yes                                                                     | <input type="checkbox"/> No  | <input type="checkbox"/> Unknown |                                  |            |                              |                             |                                  |             |                              |                             |                                  |               |                              |                             |                                  |                   |                              |                             |                                  |                 |                              |                             |                                  |               |                              |                             |                                  |                       |                              |                             |                                  |                        |                              |                             |                                  |                                                                                                                                                                                                                                                                                                                                                                                                           |
| <i>Rabbit</i>                                                                                                                                                                                                                                                                                                                                                                                                                                                                                                                                                                                                                                                                                                                                                                                                                                                                                                                                                                                                                                                                                                                                                                                                                                                                                                                                                                                                                                                                                                                                                                                                                                                                                                                                                                       | <input type="checkbox"/> Yes                                                                     | <input type="checkbox"/> No  | <input type="checkbox"/> Unknown |                                  |            |                              |                             |                                  |             |                              |                             |                                  |               |                              |                             |                                  |                   |                              |                             |                                  |                 |                              |                             |                                  |               |                              |                             |                                  |                       |                              |                             |                                  |                        |                              |                             |                                  |                                                                                                                                                                                                                                                                                                                                                                                                           |
| <i>Guinea Pig</i>                                                                                                                                                                                                                                                                                                                                                                                                                                                                                                                                                                                                                                                                                                                                                                                                                                                                                                                                                                                                                                                                                                                                                                                                                                                                                                                                                                                                                                                                                                                                                                                                                                                                                                                                                                   | <input type="checkbox"/> Yes                                                                     | <input type="checkbox"/> No  | <input type="checkbox"/> Unknown |                                  |            |                              |                             |                                  |             |                              |                             |                                  |               |                              |                             |                                  |                   |                              |                             |                                  |                 |                              |                             |                                  |               |                              |                             |                                  |                       |                              |                             |                                  |                        |                              |                             |                                  |                                                                                                                                                                                                                                                                                                                                                                                                           |
| <i>Reptiles</i>                                                                                                                                                                                                                                                                                                                                                                                                                                                                                                                                                                                                                                                                                                                                                                                                                                                                                                                                                                                                                                                                                                                                                                                                                                                                                                                                                                                                                                                                                                                                                                                                                                                                                                                                                                     | <input type="checkbox"/> Yes                                                                     | <input type="checkbox"/> No  | <input type="checkbox"/> Unknown |                                  |            |                              |                             |                                  |             |                              |                             |                                  |               |                              |                             |                                  |                   |                              |                             |                                  |                 |                              |                             |                                  |               |                              |                             |                                  |                       |                              |                             |                                  |                        |                              |                             |                                  |                                                                                                                                                                                                                                                                                                                                                                                                           |
| <i>Rabbit</i>                                                                                                                                                                                                                                                                                                                                                                                                                                                                                                                                                                                                                                                                                                                                                                                                                                                                                                                                                                                                                                                                                                                                                                                                                                                                                                                                                                                                                                                                                                                                                                                                                                                                                                                                                                       | <input type="checkbox"/> Yes                                                                     | <input type="checkbox"/> No  | <input type="checkbox"/> Unknown |                                  |            |                              |                             |                                  |             |                              |                             |                                  |               |                              |                             |                                  |                   |                              |                             |                                  |                 |                              |                             |                                  |               |                              |                             |                                  |                       |                              |                             |                                  |                        |                              |                             |                                  |                                                                                                                                                                                                                                                                                                                                                                                                           |
| <i>Chickens/ducks</i>                                                                                                                                                                                                                                                                                                                                                                                                                                                                                                                                                                                                                                                                                                                                                                                                                                                                                                                                                                                                                                                                                                                                                                                                                                                                                                                                                                                                                                                                                                                                                                                                                                                                                                                                                               | <input type="checkbox"/> Yes                                                                     | <input type="checkbox"/> No  | <input type="checkbox"/> Unknown |                                  |            |                              |                             |                                  |             |                              |                             |                                  |               |                              |                             |                                  |                   |                              |                             |                                  |                 |                              |                             |                                  |               |                              |                             |                                  |                       |                              |                             |                                  |                        |                              |                             |                                  |                                                                                                                                                                                                                                                                                                                                                                                                           |
| <i>Other (specify)</i>                                                                                                                                                                                                                                                                                                                                                                                                                                                                                                                                                                                                                                                                                                                                                                                                                                                                                                                                                                                                                                                                                                                                                                                                                                                                                                                                                                                                                                                                                                                                                                                                                                                                                                                                                              | <input type="checkbox"/> Yes                                                                     | <input type="checkbox"/> No  | <input type="checkbox"/> Unknown |                                  |            |                              |                             |                                  |             |                              |                             |                                  |               |                              |                             |                                  |                   |                              |                             |                                  |                 |                              |                             |                                  |               |                              |                             |                                  |                       |                              |                             |                                  |                        |                              |                             |                                  |                                                                                                                                                                                                                                                                                                                                                                                                           |
| <p><b>9.8 Travel</b><br/>Has your child travelled in the past 14 days?<br/><i>If yes:</i> <input type="checkbox"/> within QLD<br/><input type="checkbox"/> Interstate (specify) _____<br/><input type="checkbox"/> Overseas (specify) _____<br/>Length of time away (days) _____<br/>Date of return to home: ___/___/___</p>                                                                                                                                                                                                                                                                                                                                                                                                                                                                                                                                                                                                                                                                                                                                                                                                                                                                                                                                                                                                                                                                                                                                                                                                                                                                                                                                                                                                                                                        | <p><input type="checkbox"/> Yes <input type="checkbox"/> No <input type="checkbox"/> Unknown</p> |                              |                                  |                                  |            |                              |                             |                                  |             |                              |                             |                                  |               |                              |                             |                                  |                   |                              |                             |                                  |                 |                              |                             |                                  |               |                              |                             |                                  |                       |                              |                             |                                  |                        |                              |                             |                                  |                                                                                                                                                                                                                                                                                                                                                                                                           |

**B10. Medications:** Has the child been given any medications in the past 7 days, including today, and before he/she was brought to the ED. *Note: record all current antibiotics, antipyretics, anti-inflammatory, inhalants, cough and cold medications*  Yes  No  Unknown

| Generic name | Total daily dose & route | Start date | Stop date or write 'ongoing' | Indication |
|--------------|--------------------------|------------|------------------------------|------------|
|              |                          |            |                              |            |
|              |                          |            |                              |            |
|              |                          |            |                              |            |
|              |                          |            |                              |            |

**B10.1** Has the child been given any oral steroids, including today, and before he/she was brought to the ED in the past 30 days?  Yes  No  Unknown

| Generic name | Number of days given | Start date | Stop date or write 'ongoing' | Indication |
|--------------|----------------------|------------|------------------------------|------------|
|              |                      |            |                              |            |
|              |                      |            |                              |            |

**B11. Influenza vaccination**  
Has the child received an influenza vaccine in the preceding 12 months?  
 Yes,  No  Unknown  Not applicable as aged < 6 months

Researcher Initials: \_\_\_\_\_

Date: \_\_\_/\_\_\_/\_\_\_

**B12. Childhood immunisation schedule**

Is the child age appropriately immunised?

Yes,  parent report  confirmed by medical record  confirmed by immunisation record  
 No  Unknown

**B13. Socio-economic variables**

*I am now going to ask you some questions about your educational status, employment status, and household income. These factors are known to be important contributors to the health of children and the risk of getting chronic lung problems. These questions are also important as they help us determine how well the children that are enrolled in our study represent the broader community of Australian children and hence decide whether the results of our study can be applied to the majority of Australian children who have cough. The questions are the same questions that are asked in the Australian Census. The information will not be seen by anyone other than the researchers and will be stored securely. You can choose not to answer the questions if that is what you prefer. You can also answer the questions on this page by ticking the boxes yourself if that is more comfortable for you.*

13.1a Employment (labour force) status of parent/guardian:

|                        | Mother                   | Father                   | Guardian                 |
|------------------------|--------------------------|--------------------------|--------------------------|
| Employed full time     | <input type="checkbox"/> | <input type="checkbox"/> | <input type="checkbox"/> |
| Employed part time     | <input type="checkbox"/> | <input type="checkbox"/> | <input type="checkbox"/> |
| Employed casual        | <input type="checkbox"/> | <input type="checkbox"/> | <input type="checkbox"/> |
| Not in paid employment | <input type="checkbox"/> | <input type="checkbox"/> | <input type="checkbox"/> |
| Not applicable         | <input type="checkbox"/> | <input type="checkbox"/> | <input type="checkbox"/> |
| Unknown                | <input type="checkbox"/> | <input type="checkbox"/> | <input type="checkbox"/> |
| Declined to answer     | <input type="checkbox"/> | <input type="checkbox"/> | <input type="checkbox"/> |

13.2b Total annual **household** income (gross/before tax):

|                        |                          |
|------------------------|--------------------------|
| <\$26,000              | <input type="checkbox"/> |
| \$26,000 - < \$52,000  | <input type="checkbox"/> |
| \$52,000 - < \$78,000  | <input type="checkbox"/> |
| \$78,000 - < \$104,000 | <input type="checkbox"/> |
| \$104,000 - <\$156,000 | <input type="checkbox"/> |
| \$156,000 - <\$200,000 | <input type="checkbox"/> |
| ≥ \$200,000            | <input type="checkbox"/> |
| Unknown                | <input type="checkbox"/> |
| Declined to answer     | <input type="checkbox"/> |

13.3c Highest education level of parent(s)/guardian

|                            | Mother                   | Father                   | Guardian                 |
|----------------------------|--------------------------|--------------------------|--------------------------|
| Did not finish high school | <input type="checkbox"/> | <input type="checkbox"/> | <input type="checkbox"/> |
| High school                | <input type="checkbox"/> | <input type="checkbox"/> | <input type="checkbox"/> |
| Certificate                | <input type="checkbox"/> | <input type="checkbox"/> | <input type="checkbox"/> |
| Diploma                    | <input type="checkbox"/> | <input type="checkbox"/> | <input type="checkbox"/> |
| Bachelor degree            | <input type="checkbox"/> | <input type="checkbox"/> | <input type="checkbox"/> |
| Post graduate degree       | <input type="checkbox"/> | <input type="checkbox"/> | <input type="checkbox"/> |
| Not applicable             | <input type="checkbox"/> | <input type="checkbox"/> | <input type="checkbox"/> |
| Unknown                    | <input type="checkbox"/> | <input type="checkbox"/> | <input type="checkbox"/> |
| Declined to answer         | <input type="checkbox"/> | <input type="checkbox"/> | <input type="checkbox"/> |

*I am now going to ask you about your child's Indigenous status. It is now a national standard for this information to be collected in all health and health research data collections. This is so we can get much better information about the health of Indigenous Australians. Indigenous Australians also have much higher rates of respiratory infections and chronic lung disease than non-Indigenous Australians. You can choose not to answer the question if you don't want to.*

13.1d Is your child of Aboriginal and/or Torres Strait Islander origin?

Yes, Aboriginal  Yes, Torres Strait Islander  Yes, Aboriginal and Torres Strait Islander  
 No, not Aboriginal no Torres Strait Islander  Not known  Declined to answer

Researcher Initials: \_\_\_\_\_

Date: \_\_\_\_/\_\_\_\_/\_\_\_\_

**That is the end of the questions we need to ask you about you and your child. We will now take the nose swab and the rest of the information we need shall be collected from your medical record. I will also show you how to complete the diary card. NOTE: If the child has had a nasopharyngeal aspirate performed, an additional nose swab is not required so long as a sample of the aspirate is obtained (ie swab dipped into aspirated fluid).**

**PART C: Specimen collection**

C1. Has an anterior nasal swab been collected as per protocol?

- Yes, both nares
- No, one nare only
- No, NPA sample collected instead
- No specimens collected

C1a Reason only one nare or none collected: \_\_\_\_\_

C2. Time specimen collected: \_\_\_\_:\_\_\_\_ hrs

Was the specimen collected on the ward?  Yes  No

If yes, is the child currently on antibiotic/antiviral therapy?  Yes  No

If yes please provide the generic name, dose, route and number of doses given since ED presentation:

| Generic Name | Dose  | Route | Number of doses given |
|--------------|-------|-------|-----------------------|
| _____        | _____ | _____ | _____                 |
| _____        | _____ | _____ | _____                 |

Specimen ID number: EDCS|\_|\_|\_|\_|Day 0

**C3 Record quality of specimen collection technique**

|                                                                                | Left nare                | Right nare               |
|--------------------------------------------------------------------------------|--------------------------|--------------------------|
| Good (ie tip inserted 1cm , turned 4 times against internal nare)              | <input type="checkbox"/> | <input type="checkbox"/> |
| Fair (tip partially inserted or complete swabbing (4 turns) not achieved)      | <input type="checkbox"/> | <input type="checkbox"/> |
| Poor (difficulty in collection and unlikely to have obtained good/fair sample) | <input type="checkbox"/> | <input type="checkbox"/> |
| Not done                                                                       | <input type="checkbox"/> | <input type="checkbox"/> |
| Not applicable (NPA sample collected instead)                                  | <input type="checkbox"/> | <input type="checkbox"/> |

C3a Comments on specimen collection: \_\_\_\_\_

**SPECIMEN CHECK LIST**

- Specimen labelled correctly and specimen tracking log completed
- Specimen placed in study box in ED

**DIARY CARD CHECK LIST**

- Instructions on completing card given to parent
- Child's study ID recorded on diary card

**If a phone interview is required for workbook completion continue to Part D (Page 9)**



**PART D: Clinical information and management**

**D1. OBSERVATIONS/VITAL SIGNS AT TIME OF ED PRESENTATION...If any were not performed then measurements are to be performed by research staff.**

- a. Temperature: \_\_\_\_\_ . \_\_\_\_\_ °C    Temperature method: Oral  Per Axilla  Aural
- b. Heart rate: \_\_\_\_\_ beats per minute    c. Respiratory rate: \_\_\_\_\_ per minute
- d. O<sub>2</sub> Saturation (pulse oximetry – room air): \_\_\_\_\_%    e. On oxygen therapy?  Yes  No
- f. Weight: \_\_\_\_\_ . \_\_\_\_\_ kg    g. Height: \_\_\_\_\_ cms

**h. Abnormal chest sounds on auscultation as recorded by ED doctor examining child:**

Yes  No  Unknown  Not done  Not reliable given child distress

*If yes,*

Crackles  Yes  No  Unknown

Wheeze  Yes  No  Unknown

Other  Yes  No  Unknown    *Specify:* \_\_\_\_\_

**i. Was an ENT exam performed by the ED doctor?**  Yes  No  Unk

*If yes,*  Normal  Abnormal  Unknown  Not specified

*If abnormal,* specify abnormality: \_\_\_\_\_

**D2: Were any investigations performed whilst in the ED?**

Yes  No  Unknown

**If yes, complete table**

|                 |                                                                                           |                                                                                                                                     |
|-----------------|-------------------------------------------------------------------------------------------|-------------------------------------------------------------------------------------------------------------------------------------|
| FBC             | <input type="checkbox"/> Yes <input type="checkbox"/> No <input type="checkbox"/> Unknown | Copy of lab result attached:<br><input type="checkbox"/> Yes <input type="checkbox"/> No → <input type="checkbox"/> Follow-up       |
| UEC             | <input type="checkbox"/> Yes <input type="checkbox"/> No <input type="checkbox"/> Unknown | Copy of lab result attached:<br><input type="checkbox"/> Yes <input type="checkbox"/> No → <input type="checkbox"/> Follow-up       |
| CRP             | <input type="checkbox"/> Yes <input type="checkbox"/> No <input type="checkbox"/> Unknown | Copy of lab result attached:<br><input type="checkbox"/> Yes <input type="checkbox"/> No → <input type="checkbox"/> Follow-up       |
| NPA             | <input type="checkbox"/> Yes <input type="checkbox"/> No <input type="checkbox"/> Unknown | Results to be followed up:<br><input type="checkbox"/> Yes                                                                          |
| Blood Culture   | <input type="checkbox"/> Yes <input type="checkbox"/> No <input type="checkbox"/> Unknown | Results to be followed up:<br><input type="checkbox"/> Yes                                                                          |
| Blood Gases     | <input type="checkbox"/> Yes <input type="checkbox"/> No <input type="checkbox"/> Unknown | Copy of lab result attached:<br><input type="checkbox"/> Yes <input type="checkbox"/> No → <input type="checkbox"/> Follow-up       |
| Chest XRay      | <input type="checkbox"/> Yes <input type="checkbox"/> No <input type="checkbox"/> Unknown | Copy of radiology report attached:<br><input type="checkbox"/> Yes <input type="checkbox"/> No → <input type="checkbox"/> Follow-up |
| Lumbar Puncture | <input type="checkbox"/> Yes <input type="checkbox"/> No <input type="checkbox"/> Unknown | Results to be followed up:<br><input type="checkbox"/> Yes                                                                          |
| Other (Specify) | <input type="checkbox"/> Yes <input type="checkbox"/> No <input type="checkbox"/> Unknown | Copy of results attached:<br><input type="checkbox"/> Yes <input type="checkbox"/> No → <input type="checkbox"/> Follow-up          |

**Comments:** \_\_\_\_\_

\_\_\_\_\_

\_\_\_\_\_

**D3. Were any medications given in the ED?**  Yes  No  Unknown *If yes, complete information below*

| Generic name | Dose  | Route | Time first dose given in ED | Total doses given in ED |
|--------------|-------|-------|-----------------------------|-------------------------|
| _____        | _____ | _____ | _____                       | _____                   |
| _____        | _____ | _____ | _____                       | _____                   |
| _____        | _____ | _____ | _____                       | _____                   |
| _____        | _____ | _____ | _____                       | _____                   |

**If a phone interview is required for workbook completion continue to Part E (below)**

**PART E: Emergency Department diagnosis and discharge**

**E1: Discharge date:** \_\_\_/\_\_\_/\_\_\_ **Discharge time:** \_\_\_:\_\_\_ hrs

**E2: ED Primary medical diagnosis at time of discharge/transfer from department (EDIS):**

\_\_\_\_\_

*E2.1: Specify whether the primary diagnosis was provisional or confirmed*

Provisional  Confirmed  Not stated

**E3: ED Secondary Medical Diagnoses at time of discharge/transfer from department:**

E3a: \_\_\_\_\_  Provisional  Confirmed  Not stated

E3b: \_\_\_\_\_  Provisional  Confirmed  Not stated

E3c: \_\_\_\_\_  Provisional  Confirmed  Not stated

**E4: Was the child reviewed by a Respiratory Physician/Fellow/Registrar in the ED?**  Yes  No  Unk

*If yes, specify doctor:* \_\_\_\_\_

**E5. Discharge destination**

- Home, no further review
- Home, review in ED: *Planned review date:* \_\_\_/\_\_\_/\_\_\_
- Home, referral to/review by GP
- Home, referral to/review by RCH Specialist Outpatients: *Review date:* \_\_\_/\_\_\_/\_\_\_
- Admitted to RCH: *Admission date:* \_\_\_/\_\_\_/\_\_\_ *Admission time:* \_\_\_:\_\_\_ hrs *Ward:* \_\_\_\_\_
- Transfer to other hospital: *Specify* \_\_\_\_\_
- Did not wait for ED treatment/management

**E6. Was the child discharged on any medications?**  Yes  No  Unknown

*If yes, complete table below*

| Generic name | Dose | Route | Daily Frequency | Number of days |
|--------------|------|-------|-----------------|----------------|
|              |      |       |                 |                |
|              |      |       |                 |                |
|              |      |       |                 |                |
|              |      |       |                 |                |
|              |      |       |                 |                |
|              |      |       |                 |                |

**STUDY CHECKLIST**

- Ensure the child and/or parent has a copy of the signed consent form/ information sheet & diary card.
- Follow-up phone calls discussed with parent/guardian & diary card explained
- Screening log completed
- Specimen log completed
- Post discharge CRF completion required?**  
If yes, CRF completion request sent:  Yes  
CRF completed:  Yes
- Follow-up for outstanding results of investigations required?  
If yes, log completed:  Yes
- Follow-up for outcomes of hospital admission required?  
If yes, log completed:  Yes

**Notes/Comments:**

---

---

---

---

---

---

---

**THIS PAGE IS INTENTIONALLY  
BLANK**

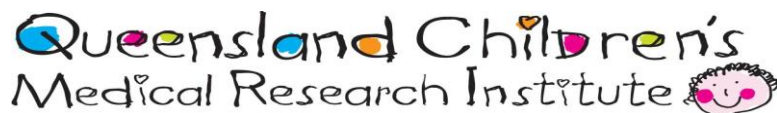

## ED Cough Study Case Report Form: Day 7 Follow-up

**Contact attempt 1**

Date: \_\_/\_\_/\_\_ Time: \_\_: \_\_ hrs Contact method:  Phone  SMS  Email

Contact successful (ie parent responds to message/call):  Yes  No

**Contact attempt 2**

Date: \_\_/\_\_/\_\_ Time: \_\_: \_\_ hrs Contact method:  Phone  SMS  Email

Contact successful (ie parent responds to message/call):  Yes  No

**Contact attempt 3**

Date: \_\_/\_\_/\_\_ Time: \_\_: \_\_ hrs Contact method:  Phone  SMS  Email

Contact successful (ie parent responds to message/call):  Yes  No

**1. Follow-up information**

1. Does the child have a cough today?  Yes  No  Unknown

2. If yes, what type of cough is it?  Wet  Dry  Both  Unknown

2a) Have you missed work because of this cough this week?  Yes  No  Unknown

*If yes, number of days missed work: |\_\_|\_\_| days*

2b) Has your child missed school/childcare this week because of this cough?  Yes  No  Unknown

*If yes, number of days missed school: |\_\_|\_\_| days*

**2. What is your child's cough score for today and for last night (circle appropriate score?)**

| Day-time cough score (today)                                                         | Night-time cough score (last night)                     |
|--------------------------------------------------------------------------------------|---------------------------------------------------------|
| 0 = No cough during the day                                                          | 0 = No cough at night                                   |
| 1 = Cough for one-two short periods only                                             | 1a = Cough on waking only (cough did not wake child up) |
| 2 = Cough for more than two short periods                                            | 1b = Cough on going to sleep only                       |
| 3 = Frequent coughing but does NOT interfere with school or other daytime activities | 2 = Awoken once or awoken early due to coughing         |
| 4 = Frequent coughing which DOES interfere with school or other daytime activities   | 3 = Frequent waking due to cough(s)                     |
| 5 = Cannot perform most usual daytime activity due to severe coughing                | 4 = Frequent cough most of the night                    |
|                                                                                      | 5 = Distressing cough                                   |

Has your child stopped coughing for 3 or more days in the past week?  Yes  No  Unknown

Parent reminded to continue daily diary card and to record any medications given:  Yes  No

Parent reminded of next follow-up contact at day 14 (± 3 days)  Yes  No

**Comments**

---



---



---

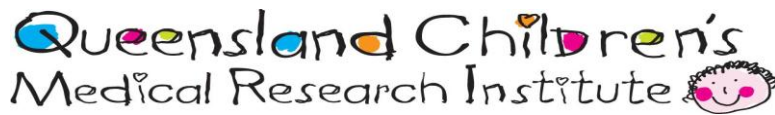

## ED Cough Study Case Report Form: Day 14 Follow-up

### Contact attempt 1

Date: \_\_\_/\_\_\_/\_\_\_ Time: \_\_\_:\_\_\_hrs Contact method:  Phone  SMS  Email

Contact successful (ie parent responds to message/call):  Yes  No

### Contact attempt 2

Date: \_\_\_/\_\_\_/\_\_\_ Time: \_\_\_:\_\_\_hrs Contact method:  Phone  SMS  Email

Contact successful (ie parent responds to message/call):  Yes  No

### Contact attempt 3

Date: \_\_\_/\_\_\_/\_\_\_ Time: \_\_\_:\_\_\_hrs Contact method:  Phone  SMS  Email

Contact successful (ie parent responds to message/call):  Yes  No

### Follow-up information

1. Does the child have a cough today?  Yes  No  Unknown
2. If yes, what type of cough is it?  Wet  Dry  Both  Unknown
  - 2a) Have you missed work because of this cough this week?  Yes  No  Unknown  
 If yes, number of days missed work: |\_|\_| days
  - 2b) Has your child missed school/childcare this week because of this cough?  Yes  No  Unknown  
 If yes, number of days missed school: |\_|\_| days

### B6. What is your child's cough score for today and for last night (circle appropriate score?)

| Day-time cough score (today)                                                         | Night-time cough score (last night)                     |
|--------------------------------------------------------------------------------------|---------------------------------------------------------|
| 0 = No cough during the day                                                          | 0 = No cough at night                                   |
| 1 = Cough for one-two short periods only                                             | 1a = Cough on waking only (cough did not wake child up) |
| 2 = Cough for more than two short periods                                            | 1b = Cough on going to sleep only                       |
| 3 = Frequent coughing but does NOT interfere with school or other daytime activities | 2 = Awoken once or awoken early due to coughing         |
| 4 = Frequent coughing which DOES interfere with school or other daytime activities   | 3 = Frequent waking due to cough(s)                     |
| 5 = Cannot perform most usual daytime activity due to severe coughing                | 4 = Frequent cough most of the night                    |
|                                                                                      | 5 = Distressing cough                                   |

Has your child stopped coughing for 3 or more days in the past week?  Yes  No  Unknown

Parent reminded to continue daily diary card and to record any medications given:  Yes  No

Parent reminded of next follow-up contact at day 21 (± 3 days)  Yes  No

### Comments

---



---



## ED Cough Study Case Report Form: Day 21 Follow-up

**Contact attempt 1**

Date: \_\_\_/\_\_\_/\_\_\_ Time: \_\_\_:\_\_\_hrs Contact method:  Phone  SMS  Email

Contact successful (ie parent responds to message/call):  Yes  No

**Contact attempt 2**

Date: \_\_\_/\_\_\_/\_\_\_ Time: \_\_\_:\_\_\_hrs Contact method:  Phone  SMS  Email

Contact successful (ie parent responds to message/call):  Yes  No

**Contact attempt 3**

Date: \_\_\_/\_\_\_/\_\_\_ Time: \_\_\_:\_\_\_hrs Contact method:  Phone  SMS  Email

Contact successful (ie parent responds to message/call):  Yes  No

**Follow-up information**

1. Does the child have a cough today?  Yes  No  Unknown
2. If yes, what type of cough is it?  Wet  Dry  Both  Unknown
  - 2a) Have you missed work because of this cough this week?  Yes  No  Unknown  
*If yes, number of days missed work: |\_|\_| days*
  - 2b) Has your child missed school/childcare this week because of this cough?  Yes  No  Unknown  
*If yes, number of days missed school: |\_|\_| days*

**B6. What is your child's cough score for today and for last night (circle appropriate score?)**

| Day-time cough score (today)                                                         | Night-time cough score (last night)                     |
|--------------------------------------------------------------------------------------|---------------------------------------------------------|
| 0 = No cough during the day                                                          | 0 = No cough at night                                   |
| 1 = Cough for one-two short periods only                                             | 1a = Cough on waking only (cough did not wake child up) |
| 2 = Cough for more than two short periods                                            | 1b = Cough on going to sleep only                       |
| 3 = Frequent coughing but does NOT interfere with school or other daytime activities | 2 = Awoken once or awoken early due to coughing         |
| 4 = Frequent coughing which DOES interfere with school or other daytime activities   | 3 = Frequent waking due to cough(s)                     |
| 5 = Cannot perform most usual daytime activity due to severe coughing                | 4 = Frequent cough most of the night                    |
|                                                                                      | 5 = Distressing cough                                   |

Has your child stopped coughing for 3 or more days in the past week?  Yes  No  Unknown

Parent reminded to continue daily diary card and to record any medications given:  Yes  No

Parent reminded of next follow-up contact at day 28 (± 3 days)  Yes  No

**Comments**

---



---

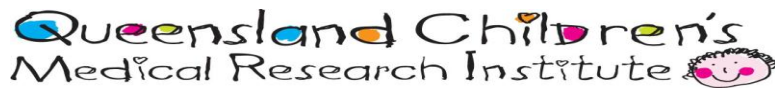

## ED Cough Study Case Report Form: Day 28 Follow-up

### Contact attempt 1

Date: \_\_\_/\_\_\_/\_\_\_ Time: \_\_\_:\_\_\_hrs Contact method:  Phone  SMS  Email

Contact successful (ie parent responds to message/call):  Yes  No

### Contact attempt 2

Date: \_\_\_/\_\_\_/\_\_\_ Time: \_\_\_:\_\_\_hrs Contact method:  Phone  SMS  Email

Contact successful (ie parent responds to message/call):  Yes  No

### Contact attempt 3

Date: \_\_\_/\_\_\_/\_\_\_ Time: \_\_\_:\_\_\_hrs Contact method:  Phone  SMS  Email

Contact successful (ie parent responds to message/call):  Yes  No

### Follow-up information

Does the child have a cough today?  Yes  No  Unknown

If yes, what type of cough is it?  Wet  Dry  Both  Unknown

2a) Have you missed work because of this cough this week?  Yes  No  Unknown

If yes, number of days missed work: |\_|\_| days

2b) Has your child missed school/childcare this week because of this cough?  Yes  No  Unknown

If yes, number of days missed school: |\_|\_| days

### B6. What is your child's cough score for today and for last night (circle appropriate score?)

| Day-time cough score (today)                                                         | Night-time cough score (last night)                     |
|--------------------------------------------------------------------------------------|---------------------------------------------------------|
| 0 = No cough during the day                                                          | 0 = No cough at night                                   |
| 1 = Cough for one-two short periods only                                             | 1a = Cough on waking only (cough did not wake child up) |
| 2 = Cough for more than two short periods                                            | 1b = Cough on going to sleep only                       |
| 3 = Frequent coughing but does NOT interfere with school or other daytime activities | 2 = Awoken once or awoken early due to coughing         |
| 4 = Frequent coughing which DOES interfere with school or other daytime activities   | 3 = Frequent waking due to cough(s)                     |
| 5 = Cannot perform most usual daytime activity due to severe coughing                | 4 = Frequent cough most of the night                    |
|                                                                                      | 5 = Distressing cough                                   |

Has your child stopped coughing for 3 or more days in the past week?  Yes  No  Unknown

Child requires review by paediatric respiratory physician in next 2 weeks?  Yes  No

If yes: Appointment booked:  Yes

Date of appointment: \_\_\_/\_\_\_/\_\_\_

Time of appointment: \_\_\_:\_\_\_hrs

Physician:  Dr Marchant  Dr Butain  Prof Chang  Other (specify) \_\_\_\_\_

Parents notified of appointment  Yes → Date: \_\_\_/\_\_\_/\_\_\_ ( Phone  Email  Letter)

Referral letter completed and signed  Yes → Date: \_\_\_/\_\_\_/\_\_\_



**Comments**

---

---

---

---

---

---

---

---

---

---

---

---

---

---

---

---

---

---

---

---

---

---

---

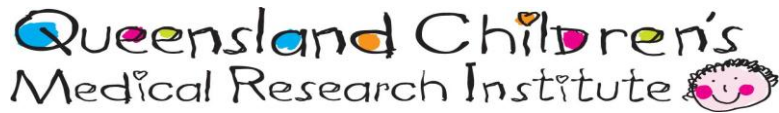

## ED Cough Study Case Report Form: Hospitalisation Record

Complete for children admitted to RCH from the ED department

(Affix RCH Identification Label Here)

H1. Admission date: \_\_\_/\_\_\_/\_\_\_ H2. Admission time: \_\_\_:\_\_\_ hrs H3. Admission ward: \_\_\_\_\_

H4. Discharge date: \_\_\_/\_\_\_/\_\_\_ H5. Discharge time: \_\_\_:\_\_\_ hrs

H6. Was the child admitted to the Intensive Care Unit during hospital admission?  Yes  No  Unknown

H7. Was the child reviewed by the Paediatric Respiratory Team during admission?  Yes  No  Unknown

**H8. Discharge destination:**

- Home
- Died
- Transfer to other hospital/health care facility
- Left without medical discharge
- Not stated

H9. Primary discharge diagnosis: \_\_\_\_\_ ICD-10-AM Code: \_\_\_\_\_

**H10. Secondary discharge diagnoses**

- a) \_\_\_\_\_ ICD-10-AM Code: \_\_\_\_\_
- b) \_\_\_\_\_ ICD-10-AM Code: \_\_\_\_\_
- c) \_\_\_\_\_ ICD-10-AM Code: \_\_\_\_\_
- d) \_\_\_\_\_ ICD-10-AM Code: \_\_\_\_\_

H11. Was a CXR performed during hospitalisation?  Yes  No  Unknown

If yes, diagnosis: \_\_\_\_\_

H12. Was a Chest CT scan performed during hospitalisation?  Yes  No  Unknown

If yes, diagnosis: \_\_\_\_\_

**Comments:**

---

---

---

**THIS PAGE IS INTENTIONALLY  
BLANK**

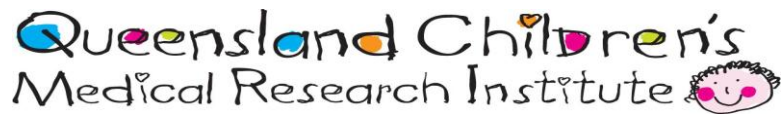

## ED Cough Study Case Report Form: Specialist review

(Affix RCH Identification Label Here)

Date of review: \_\_\_/\_\_\_/\_\_\_ Specialist performing review: \_\_\_\_\_

### SR 1. Cough History

| <p><b>SR1.1 Does the child have a cough today?</b></p> <p><i>If yes:</i> a) how long has the child had the cough?<br/>b) what type of cough does the child have today?<br/>c) has there been <math>\geq 3</math> days without a cough since day 28?</p> <p><i>If no,</i> a) when was the last day of cough after day 28<br/>b) how many days has the child NOT had a cough since day 28 of the study (ie. last day of the diary card)</p>                                                                                                                                                                                                                                                                                                                                                                                                                                                                                                                                                                                                                                                                                             | <p><input type="checkbox"/> Yes <input type="checkbox"/> No <input type="checkbox"/> Unknown</p> <p> _ _  weeks</p> <p><input type="checkbox"/> Wet <input type="checkbox"/> Dry <input type="checkbox"/> Variable</p> <p><input type="checkbox"/> Yes <input type="checkbox"/> No <input type="checkbox"/> Unknown</p> <p>___/___/___</p> <p> _ _  days</p>                                                                                                                                         |                              |                                     |                             |                       |                                          |                                                         |                                           |                                   |                                                                                      |                                                 |                                                                                    |                                     |                                                                       |                                      |  |                       |
|---------------------------------------------------------------------------------------------------------------------------------------------------------------------------------------------------------------------------------------------------------------------------------------------------------------------------------------------------------------------------------------------------------------------------------------------------------------------------------------------------------------------------------------------------------------------------------------------------------------------------------------------------------------------------------------------------------------------------------------------------------------------------------------------------------------------------------------------------------------------------------------------------------------------------------------------------------------------------------------------------------------------------------------------------------------------------------------------------------------------------------------|------------------------------------------------------------------------------------------------------------------------------------------------------------------------------------------------------------------------------------------------------------------------------------------------------------------------------------------------------------------------------------------------------------------------------------------------------------------------------------------------------|------------------------------|-------------------------------------|-----------------------------|-----------------------|------------------------------------------|---------------------------------------------------------|-------------------------------------------|-----------------------------------|--------------------------------------------------------------------------------------|-------------------------------------------------|------------------------------------------------------------------------------------|-------------------------------------|-----------------------------------------------------------------------|--------------------------------------|--|-----------------------|
| <p><b>SR1.2 Has the child ever had episodes of cough that have lasted more than 4 weeks?</b></p> <p><i>If yes,</i> at what age did the child first have an extended episode of cough</p>                                                                                                                                                                                                                                                                                                                                                                                                                                                                                                                                                                                                                                                                                                                                                                                                                                                                                                                                              | <p><input type="checkbox"/> Yes <input type="checkbox"/> No <input type="checkbox"/> Unknown</p> <p> _ _  <input type="checkbox"/> Unknown</p>                                                                                                                                                                                                                                                                                                                                                       |                              |                                     |                             |                       |                                          |                                                         |                                           |                                   |                                                                                      |                                                 |                                                                                    |                                     |                                                                       |                                      |  |                       |
| <p><b>SR1.3 Cough Score for today</b></p> <table border="1" style="width: 100%; border-collapse: collapse;"> <thead> <tr> <th style="width: 50%;">Day-time cough score (today)</th> <th style="width: 50%;">Night-time cough score (last night)</th> </tr> </thead> <tbody> <tr> <td>0 = No cough during the day</td> <td>0 = No cough at night</td> </tr> <tr> <td>1 = Cough for one-two short periods only</td> <td>1a = Cough on waking only (cough did not wake child up)</td> </tr> <tr> <td>2 = Cough for more than two short periods</td> <td>1b = Cough on going to sleep only</td> </tr> <tr> <td>3 = Frequent coughing but does NOT interfere with school or other daytime activities</td> <td>2 = Awoken once or awoken early due to coughing</td> </tr> <tr> <td>4 = Frequent coughing which DOES interfere with school or other daytime activities</td> <td>3 = Frequent waking due to cough(s)</td> </tr> <tr> <td>5 = Cannot perform most usual daytime activity due to severe coughing</td> <td>4 = Frequent cough most of the night</td> </tr> <tr> <td></td> <td>5 = Distressing cough</td> </tr> </tbody> </table> |                                                                                                                                                                                                                                                                                                                                                                                                                                                                                                      | Day-time cough score (today) | Night-time cough score (last night) | 0 = No cough during the day | 0 = No cough at night | 1 = Cough for one-two short periods only | 1a = Cough on waking only (cough did not wake child up) | 2 = Cough for more than two short periods | 1b = Cough on going to sleep only | 3 = Frequent coughing but does NOT interfere with school or other daytime activities | 2 = Awoken once or awoken early due to coughing | 4 = Frequent coughing which DOES interfere with school or other daytime activities | 3 = Frequent waking due to cough(s) | 5 = Cannot perform most usual daytime activity due to severe coughing | 4 = Frequent cough most of the night |  | 5 = Distressing cough |
| Day-time cough score (today)                                                                                                                                                                                                                                                                                                                                                                                                                                                                                                                                                                                                                                                                                                                                                                                                                                                                                                                                                                                                                                                                                                          | Night-time cough score (last night)                                                                                                                                                                                                                                                                                                                                                                                                                                                                  |                              |                                     |                             |                       |                                          |                                                         |                                           |                                   |                                                                                      |                                                 |                                                                                    |                                     |                                                                       |                                      |  |                       |
| 0 = No cough during the day                                                                                                                                                                                                                                                                                                                                                                                                                                                                                                                                                                                                                                                                                                                                                                                                                                                                                                                                                                                                                                                                                                           | 0 = No cough at night                                                                                                                                                                                                                                                                                                                                                                                                                                                                                |                              |                                     |                             |                       |                                          |                                                         |                                           |                                   |                                                                                      |                                                 |                                                                                    |                                     |                                                                       |                                      |  |                       |
| 1 = Cough for one-two short periods only                                                                                                                                                                                                                                                                                                                                                                                                                                                                                                                                                                                                                                                                                                                                                                                                                                                                                                                                                                                                                                                                                              | 1a = Cough on waking only (cough did not wake child up)                                                                                                                                                                                                                                                                                                                                                                                                                                              |                              |                                     |                             |                       |                                          |                                                         |                                           |                                   |                                                                                      |                                                 |                                                                                    |                                     |                                                                       |                                      |  |                       |
| 2 = Cough for more than two short periods                                                                                                                                                                                                                                                                                                                                                                                                                                                                                                                                                                                                                                                                                                                                                                                                                                                                                                                                                                                                                                                                                             | 1b = Cough on going to sleep only                                                                                                                                                                                                                                                                                                                                                                                                                                                                    |                              |                                     |                             |                       |                                          |                                                         |                                           |                                   |                                                                                      |                                                 |                                                                                    |                                     |                                                                       |                                      |  |                       |
| 3 = Frequent coughing but does NOT interfere with school or other daytime activities                                                                                                                                                                                                                                                                                                                                                                                                                                                                                                                                                                                                                                                                                                                                                                                                                                                                                                                                                                                                                                                  | 2 = Awoken once or awoken early due to coughing                                                                                                                                                                                                                                                                                                                                                                                                                                                      |                              |                                     |                             |                       |                                          |                                                         |                                           |                                   |                                                                                      |                                                 |                                                                                    |                                     |                                                                       |                                      |  |                       |
| 4 = Frequent coughing which DOES interfere with school or other daytime activities                                                                                                                                                                                                                                                                                                                                                                                                                                                                                                                                                                                                                                                                                                                                                                                                                                                                                                                                                                                                                                                    | 3 = Frequent waking due to cough(s)                                                                                                                                                                                                                                                                                                                                                                                                                                                                  |                              |                                     |                             |                       |                                          |                                                         |                                           |                                   |                                                                                      |                                                 |                                                                                    |                                     |                                                                       |                                      |  |                       |
| 5 = Cannot perform most usual daytime activity due to severe coughing                                                                                                                                                                                                                                                                                                                                                                                                                                                                                                                                                                                                                                                                                                                                                                                                                                                                                                                                                                                                                                                                 | 4 = Frequent cough most of the night                                                                                                                                                                                                                                                                                                                                                                                                                                                                 |                              |                                     |                             |                       |                                          |                                                         |                                           |                                   |                                                                                      |                                                 |                                                                                    |                                     |                                                                       |                                      |  |                       |
|                                                                                                                                                                                                                                                                                                                                                                                                                                                                                                                                                                                                                                                                                                                                                                                                                                                                                                                                                                                                                                                                                                                                       | 5 = Distressing cough                                                                                                                                                                                                                                                                                                                                                                                                                                                                                |                              |                                     |                             |                       |                                          |                                                         |                                           |                                   |                                                                                      |                                                 |                                                                                    |                                     |                                                                       |                                      |  |                       |
| <p><b>SR 1.4 Chest sounds/breathing difficulty</b></p> <p>a) Wheeze<br/>b) Rattle<br/>c) Shortness of breath<br/>d) Stridor<br/>e) Other (Specify) _____</p>                                                                                                                                                                                                                                                                                                                                                                                                                                                                                                                                                                                                                                                                                                                                                                                                                                                                                                                                                                          | <p><input type="checkbox"/> Yes <input type="checkbox"/> No <input type="checkbox"/> Unknown</p> <p><input type="checkbox"/> Yes <input type="checkbox"/> No <input type="checkbox"/> Unknown</p> <p><input type="checkbox"/> Yes <input type="checkbox"/> No <input type="checkbox"/> Unknown</p> <p><input type="checkbox"/> Yes <input type="checkbox"/> No <input type="checkbox"/> Unknown</p> <p><input type="checkbox"/> Yes <input type="checkbox"/> No <input type="checkbox"/> Unknown</p> |                              |                                     |                             |                       |                                          |                                                         |                                           |                                   |                                                                                      |                                                 |                                                                                    |                                     |                                                                       |                                      |  |                       |

### SR 2. Physical Examination

|                                                                                                                                                                                         |                                                                                                                                                                                                                                                                                            |
|-----------------------------------------------------------------------------------------------------------------------------------------------------------------------------------------|--------------------------------------------------------------------------------------------------------------------------------------------------------------------------------------------------------------------------------------------------------------------------------------------|
| Height:  __ __ __ cm                                                                                                                                                                    | Weight:  __ __ __ . __ kg                                                                                                                                                                                                                                                                  |
| Respiratory rate:  __ __ __  rpm                                                                                                                                                        | Increased work of breathing: <input type="checkbox"/> Yes <input type="checkbox"/> No <input type="checkbox"/> Unknown<br>If yes, describe:                                                                                                                                                |
| Cough heard: <input type="checkbox"/> Yes <input type="checkbox"/> No <input type="checkbox"/> Unknown<br>If yes, cough type: <input type="checkbox"/> Wet <input type="checkbox"/> Dry |                                                                                                                                                                                                                                                                                            |
| Clubbing                                                                                                                                                                                | <input type="checkbox"/> Yes <input type="checkbox"/> No <input type="checkbox"/> Unknown                                                                                                                                                                                                  |
| Harrison sulcus                                                                                                                                                                         | <input type="checkbox"/> Yes <input type="checkbox"/> No <input type="checkbox"/> Unknown                                                                                                                                                                                                  |
| CWD                                                                                                                                                                                     | <input type="checkbox"/> Yes <input type="checkbox"/> No <input type="checkbox"/> Unknown                                                                                                                                                                                                  |
| Crepitations                                                                                                                                                                            | <input type="checkbox"/> Yes <input type="checkbox"/> No <input type="checkbox"/> Unknown                                                                                                                                                                                                  |
| Wheeze                                                                                                                                                                                  | <input type="checkbox"/> Yes <input type="checkbox"/> No <input type="checkbox"/> Unknown                                                                                                                                                                                                  |
| Other chest sounds<br><b>If yes, specify:</b>                                                                                                                                           | <input type="checkbox"/> Yes <input type="checkbox"/> No <input type="checkbox"/> Unknown                                                                                                                                                                                                  |
| ENT Examination<br><b>If abnormal, specify:</b>                                                                                                                                         | <input type="checkbox"/> Normal <input type="checkbox"/> Abnormal <input type="checkbox"/> Not done                                                                                                                                                                                        |
| Spirometry<br>Pre B2 Loop Shape<br>Post B2 Loop Shape                                                                                                                                   | <input type="checkbox"/> Normal <input type="checkbox"/> Obstructive <input type="checkbox"/> Restrictive <input type="checkbox"/> Not done<br><input type="checkbox"/> Normal <input type="checkbox"/> Obstructive <input type="checkbox"/> Restrictive <input type="checkbox"/> Not done |
| Chest xray<br><b>If abnormal, specify:</b>                                                                                                                                              | <input type="checkbox"/> Normal <input type="checkbox"/> Abnormal <input type="checkbox"/> Not done                                                                                                                                                                                        |

### SR3: Specimen collection

SR3.1 Has an anterior nasal swab been collected as per protocol?

Yes, both nares  Time specimen collected: \_\_\_\_:\_\_\_\_ hrs

No, one nare only

No specimens collected

Reason only one nare or none collected: \_\_\_\_\_

Specimen ID number: **EDCS**|\_\_|\_\_|\_\_|\_\_|Day \_\_\_\_\_

#### SR3.3 Record quality of specimen collection technique

|                                                                                | Left nare                | Right nare               |
|--------------------------------------------------------------------------------|--------------------------|--------------------------|
| Good (ie tip inserted 1cm, turned 4 times against internal nare)               | <input type="checkbox"/> | <input type="checkbox"/> |
| Fair (tip partially inserted or complete swabbing (4 turns) not achieved)      | <input type="checkbox"/> | <input type="checkbox"/> |
| Poor (difficulty in collection and unlikely to have obtained good/fair sample) | <input type="checkbox"/> | <input type="checkbox"/> |
| Not done                                                                       | <input type="checkbox"/> | <input type="checkbox"/> |

SR3.4 Comments on specimen collection: \_\_\_\_\_

**SPECIMEN CHECK LIST**

- Specimen labelled correctly and specimen tracking log completed
- Specimen placed in study box in ED fridge?

**SR 4. Diagnoses**

SR4.1 Provisional primary diagnosis: \_\_\_\_\_

SR4.2 Comorbidities: a) \_\_\_\_\_ b) \_\_\_\_\_ c) \_\_\_\_\_

SR4.3 Other investigations planned:  HRCT  Bronchoscopy  Other (specify) \_\_\_\_\_

SR4.4 Final primary diagnosis: \_\_\_\_\_ Date confirmed: \_\_\_\_/\_\_\_\_/\_\_\_\_

SR4.5 Final additional diagnoses: \_\_\_\_\_ Date confirmed: \_\_\_\_/\_\_\_\_/\_\_\_\_

**SR 5. Comments (including relevant management)**

---

---

---

---

---

---

---

---

---

---

---

---

---

---

---

---

---

---

---

---

---

---

---

## Study completion

**SC1. Date of last study contact with child:** \_\_\_/\_\_\_/\_\_\_

**SC2. Was the child withdrawn from the study?**  Yes  No

**SC2.1 If yes, specify reason for withdrawal:**

- Protocol violation
- Loss to follow-up
- Parent withdrew consent
- Child withdrew consent

**SC3. Has the child's diary card been returned?**  Yes  No

**SC3.1 If no, specify reason**

- Loss to follow-up
- Diary card lost in mail
- Other (specify) \_\_\_\_\_

**SC4. Have nasal specimens for this child been received at Qpid?**  Yes  No

**SC4.1 If yes, specify the specimens received:**  Day 0  Specialist review

**SC4.2 If no, specify reason**

- Loss to follow-up
- Specimen lost in transit
- Specimen not collected (tick specimen not collected):  Day 0  Specialist review
- Other (specify) \_\_\_\_\_

**SC5. If applicable, did the child present for specialist review?**  Yes  No  Not applicable

**SC5.1 If no, specify reason**

- Loss to follow-up
- Moved away from area and unable to attend
- Parent decision not to attend
- Other (specify) \_\_\_\_\_

**Researcher Initials:** \_\_\_\_\_

**Date:** \_\_\_/\_\_\_/\_\_\_
